# Supplementary material
Source: Springer Nature journal article supplement (https://www.springermedizin.de/resource/supplementary/12943_2009_571_MOESM3_ESM.pdf/9555002)

control ● bortezomib prevention trial ● bortezomib regression trial ●

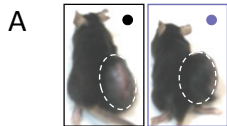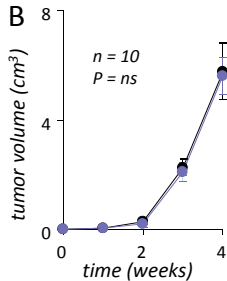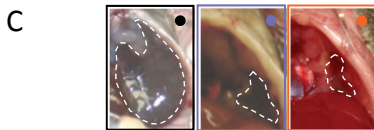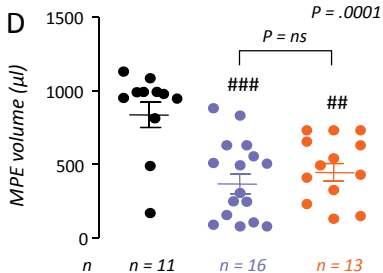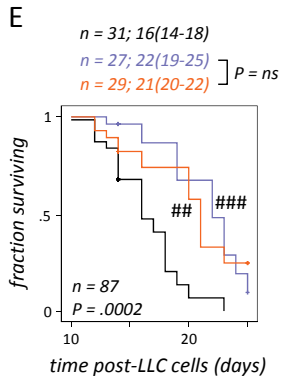

Supplement: MOESM3 [file 9555002]
